# Supplementary material for: Molecular tag for promoting N-glycan maturation in the cargo receptor-mediated secretion pathway
Source: PubMed Central journal article supplement — iScience. 2024 Nov 22;27(12):111457. doi: 10.1016/j.isci.2024.111457 (PMC11664129; doi:10.1016/j.isci.2024.111457), 2024-11-22
Supplement: mmc1.pdf [file mmc1.pdf]

**Supplemental information**

**Molecular tag for promoting *N*-glycan  
maturation in the cargo receptor-mediated  
secretion pathway**

**Hirokazu Yagi, Rino Yamada, Taiki Saito, Rena Honda, Rio Nakano, Kengo Inutsuka, Seigo Tateo, Hideo Kusano, Kumiko Nishimura, Saeko Yanaka, Takuro Tojima, Akihiko Nakano, Jun-ichi Furukawa, Maho Yagi-Utsumi, Shungo Adachi, and Koichi Kato**

## Supplementary information

### **Molecular tag for promoting *N*-glycan maturation in the cargo receptor-mediated secretion pathway**

Hirokazu Yagi<sup>1,2,\*</sup>, Rino Yamada<sup>1</sup>, Taiki Saito<sup>1,2,3</sup>, Rena Honda<sup>1,3,4</sup>, Rio Nakano<sup>1</sup>, Kengo Inutsuka<sup>1</sup>, Seigo Tateo<sup>1,2,3</sup>, Hideo Kusano<sup>5</sup>, Kumiko Nishimura<sup>5</sup>, Saeko Yanaka<sup>1,2,3,4</sup>, Takuro Tojima<sup>6</sup>, Akihiko Nakano<sup>6</sup>, Jun-ichi Furukawa<sup>7</sup>, Maho Yagi-Utsumi<sup>1,2,3,4</sup>, Shungo Adachi<sup>5</sup>, and Koichi Kato<sup>1,2,3,4,\*\*</sup>

<sup>1</sup>Faculty and Graduate School of Pharmaceutical Sciences, Nagoya City University, Nagoya 467-8603, Japan, <sup>2</sup>Exploratory Research Center on Life and Living Systems (ExCELLS) and <sup>3</sup>Institute for Molecular Science, National Institutes of Natural Sciences, Okazaki 444-8787, Japan, <sup>4</sup>Graduate Institute for Advanced Studies, SOKENDAI, Kanagawa 240-0193, Japan <sup>5</sup>Department of Proteomics, National Cancer Center Research Institute, Tokyo, 104-0045 Japan, <sup>6</sup>RIKEN Center for Advanced Photonics, Wako, Saitama 351-0198, Japan <sup>7</sup>Institute for Glyco-core Research (iGCORE), Nagoya University, Nagoya 464-8601, Japan

**Correspondence:** \*Hirokazu Yagi, Ph.D., Graduate School of Pharmaceutical Sciences, Nagoya City University, 3-1 Tanabe-dori, Mizuho-ku, Nagoya 467-8603, Japan, Tel. +81-52-836-3448, Fax: +81-52-836-3450, e-mail: hyagi@phar.nagoya-cu.ac.jp

and

\*\*Koichi Kato, Ph.D., Exploratory Research Center on Life and Living Systems and Institute for Molecular Science, National Institutes of Natural Sciences, 5-1 Higashiyama, Myodaiji, Okazaki, Aichi 444-8787, Japan, Tel. +81-564-59-5225, Fax: +81-564-59-5224, e-mail: kkatonmr@ims.ac.jp

Lead Contact: \*Hirokazu Yagi, Ph.D., Graduate School of Pharmaceutical Sciences, Nagoya City University, 3-1 Tanabe-dori, Mizuho-ku, Nagoya 467-8603, Japan, Tel. +81-52-836-3448, Fax: +81-52-836-3450, e-mail: hyagi@phar.nagoya-cu.ac.jp

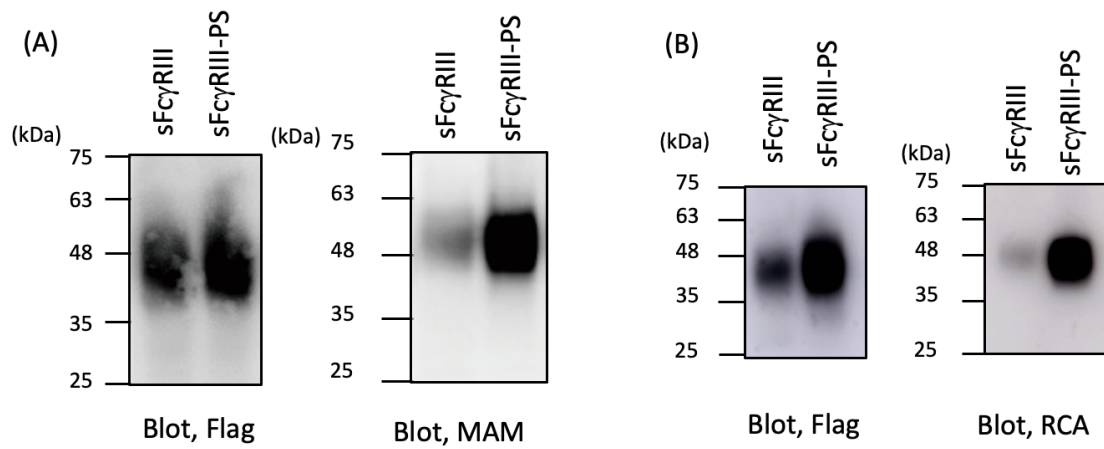

**Figure S1. The effect of passport sequence on the galactosylation and sialylation levels of recombinant sFcyRIII.**

(A) Tagging with the passport sequence increased the sialylation level of recombinant sFcyRIII produced in Expi293F cells. The sialylation level was determined through immunoblotting using anti-Flag antibody and lectin blotting using MAM. (B) Tagging with the passport sequence increased the galactosylation level of desialylated recombinant sFcyRIII produced in Expi293F cells. The galactosylation level was determined through immunoblotting using an anti-Flag antibody and lectin blotting using RCA.

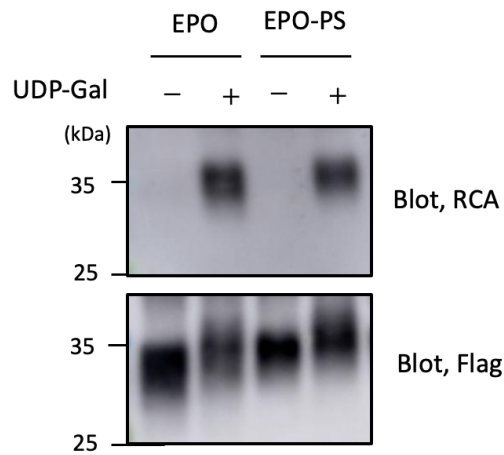

**Figure S2. Assay to investigate the potential effect of PS on the *in vitro* galactosylation of EPO by recombinant B4GALT1.**

Recombinant EPO-PS was produced in Expi293F cells and subjected to enzymatic treatment for de-sialylation and de-galactosylation. A portion of the de-galactosylated EPO-PS was treated with TEV protease to cleave the PS tag (EPO). EPO and EPO-PS were then used as acceptor substrates in an *in vitro* enzymatic reaction with recombinant B4GALT1. The galactosylation levels were determined by immunoblotting using an anti-Flag antibody and lectin blotting using RCA.

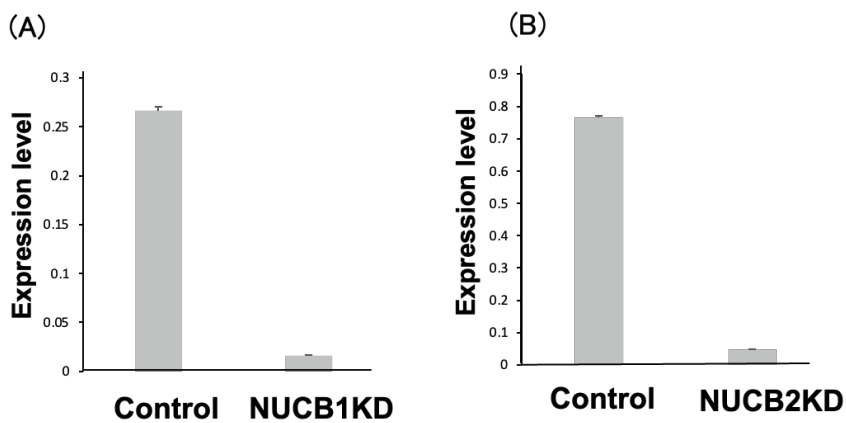

**Figure S3. The efficiency of siRNA transfection.**

The qRT-PCR revealed that (A) NUCB1 or (B) NUCB2 gene expression significantly decreased in Expi293F cells expressing EPO-PS under treatment with NUCB1 or NUCB2 siRNAs, respectively, compared to control siRNA

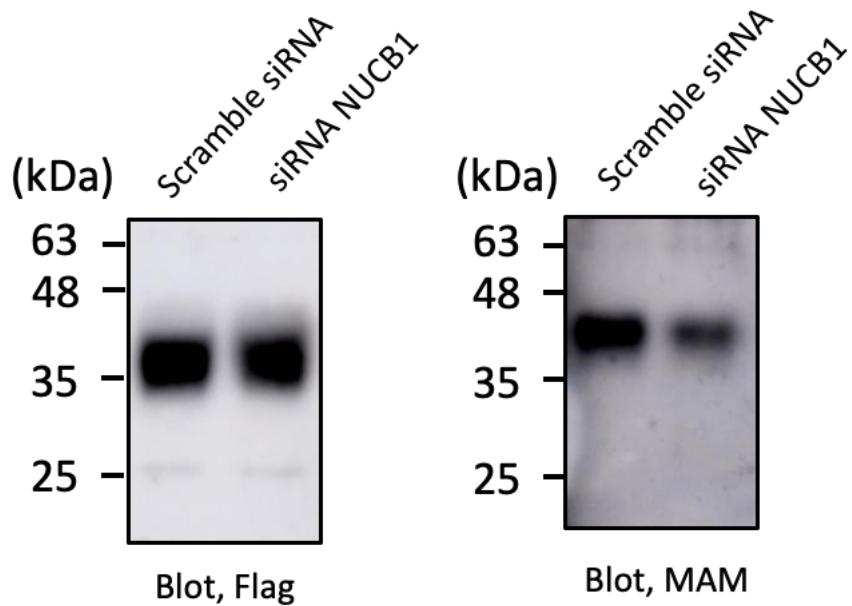

**Figure S4. The depletion of NUCB1 had little to no effect on the expression levels of recombinant EPO-PS driven by the passport sequence.**

Expi293F cells expressing EPO-PS were treated with control-siRNA and NUCB1-siRNA. After 24 h of cultivation, EPO and EPO-PS were purified from the culture medium using anti-Flag antibody-conjugated resin. Subsequently, the purified proteins were subjected to blotting with an anti-Flag antibody and MAM.

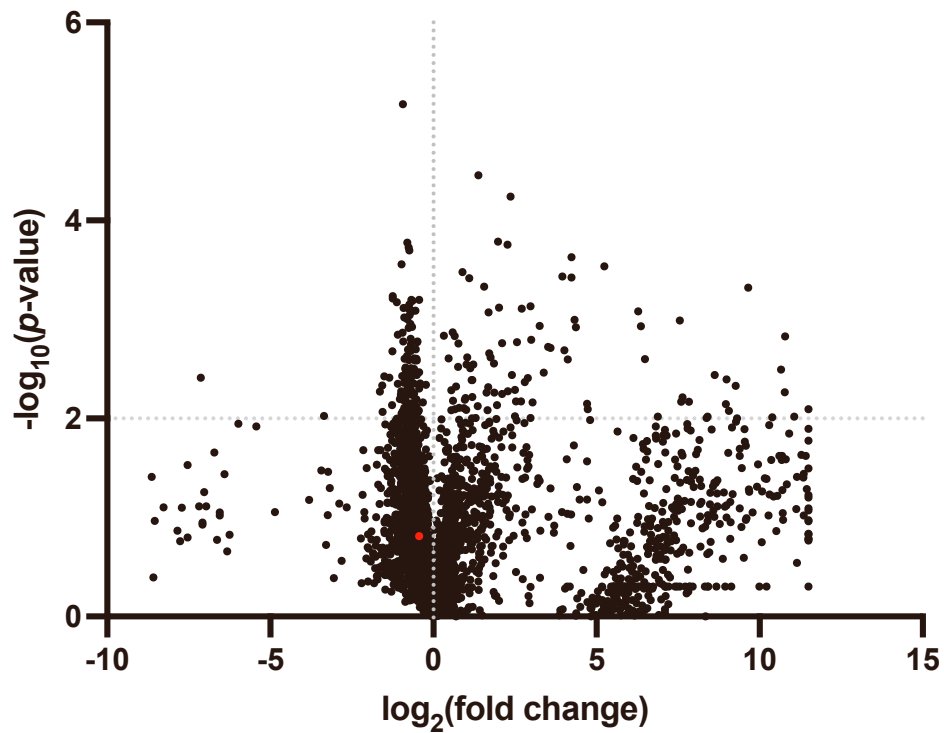

**Figure S5. Volcano plot highlighting significantly enriched NUCB1-proximal proteins measured with LC-MS/MS.**

Expi293F cells expressing NUCB1-TbN and NUCB1-TbC were incubated for 1 h with biotin to enrich biotinylated proteins in the secretory pathway. After pulldown with streptavidin-Sepharose, the tryptic digested samples were analyzed using MS. Red dot shows B4GALT1.

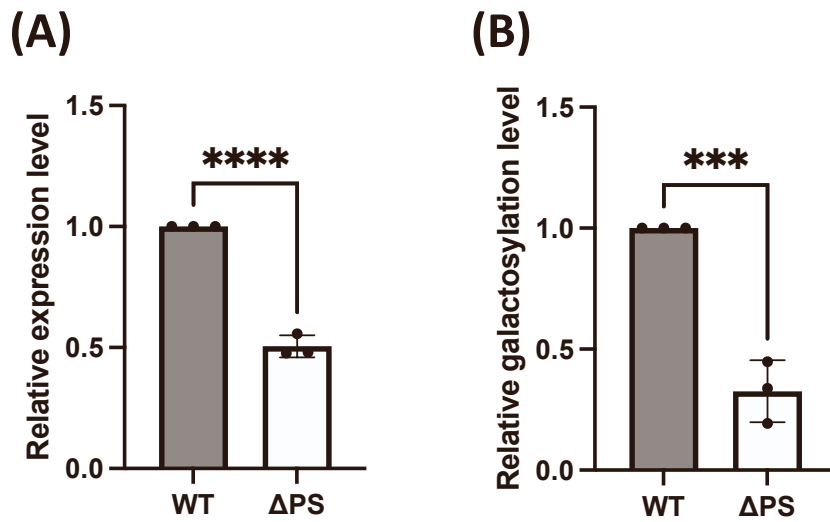

**Figure S6. PS-dependent *N*-glycan maturation of recombinant FVIII produced in Expi293F cells.**

(A) Relative expression and (B) galactosylation levels of FVIII $\Delta$ PS ( $\Delta$ PS) to PS-harboring FVIII (WT) based on the density plot anti-Flag and RCA, respectively. By calculating the RCA/Flag ratios with these values, Figure 7B was produced. Error bars denote the SEM (n = 3 independent experiments). Statistical significance was assessed by unpaired t-test: \*\*\* $p < 0.001$ , \*\*\*\* $p < 0.0001$

**Table S1. List of plasmids used in this study**

| <b>Plasmid name</b>                         | <b>Source</b> | <b>Benchling link</b>                                                                                                                                                 |
|---------------------------------------------|---------------|-----------------------------------------------------------------------------------------------------------------------------------------------------------------------|
| p3xFLAG-CMV9-EPO                            | [1]           |                                                                                                                                                                       |
| p3xFLAG-CMV9-EPO-PS                         | [1]           |                                                                                                                                                                       |
| p3xHA-CMV9-EPO                              | this study    | <a href="https://benchling.com/s/seq-tgznJYRwle9x9NhSinGi?m=slm-N33If17IPDC9F3Rnh9Rh">https://benchling.com/s/seq-tgznJYRwle9x9NhSinGi?m=slm-N33If17IPDC9F3Rnh9Rh</a> |
| p3xFLAG-CMV9-sFcyRIIIa                      | [1]           |                                                                                                                                                                       |
| p3xFLAG-CMV9-sFcyRIIIa-PS                   | [1]           |                                                                                                                                                                       |
| p3xFLAG-CMV9-EPO-TEV-PS                     | this study    | <a href="https://benchling.com/s/seq-NW6ysZ5qU8fgctknwjRy?m=slm-4dBY5EMMdcberQ7WVnJJ">https://benchling.com/s/seq-NW6ysZ5qU8fgctknwjRy?m=slm-4dBY5EMMdcberQ7WVnJJ</a> |
| p3xFLAG-CMV9-TurboID-EPO                    | this study    | <a href="https://benchling.com/s/seq-IFZP9ylKjaHLULXGEtDR?m=slm-hVb5izqEfgWm0RRpcquA">https://benchling.com/s/seq-IFZP9ylKjaHLULXGEtDR?m=slm-hVb5izqEfgWm0RRpcquA</a> |
| p3xFLAG-CMV9-TurboID-EPO                    | this study    | <a href="https://benchling.com/s/seq-N1BSRxAjxXQQkBbWZZop?m=slm-SKizLoccQLH7W1PT1Axa">https://benchling.com/s/seq-N1BSRxAjxXQQkBbWZZop?m=slm-SKizLoccQLH7W1PT1Axa</a> |
| NUCB1-HA                                    | this study    | <a href="https://benchling.com/s/seq-NpCTEDUOYRh4aGW1RseU?m=slm-Ds2uA3IJYyWg6BeBKaa">https://benchling.com/s/seq-NpCTEDUOYRh4aGW1RseU?m=slm-Ds2uA3IJYyWg6BeBKaa</a>   |
| pcold1-NUCB1                                | this study    | <a href="https://benchling.com/s/seq-oVcLNda1X8z0XGHVjCzJ?m=slm-Up0tvm2C7wLCEZIQXpkM">https://benchling.com/s/seq-oVcLNda1X8z0XGHVjCzJ?m=slm-Up0tvm2C7wLCEZIQXpkM</a> |
| pET28a Ub-FVIII fragment<br>(Asn776–Asp838) | [1]           |                                                                                                                                                                       |
| NUCB1-EGFP                                  | this study    | <a href="https://benchling.com/s/seq-jvgviqj64x9HveN4hLs4?m=slm-CR5tIbr9x9oaQ4DetNk9">https://benchling.com/s/seq-jvgviqj64x9HveN4hLs4?m=slm-CR5tIbr9x9oaQ4DetNk9</a> |
| pCAGGS- B4GALT1-mScarlet-I                  | [2]           |                                                                                                                                                                       |
| pCAGGS-B4GALT1-TurboID                      | this study    | <a href="https://benchling.com/s/seq-J8xckWrfZpVktF5pFRI?m=slm-IoZ7Hwb8rW4Gc69ALyJ">https://benchling.com/s/seq-J8xckWrfZpVktF5pFRI?m=slm-IoZ7Hwb8rW4Gc69ALyJ</a>     |



|                                             |            |                                                                                                                                                                       |
|---------------------------------------------|------------|-----------------------------------------------------------------------------------------------------------------------------------------------------------------------|
| pCAGGS-B4GALT1-splitTurboID-N (B4GALT1-TbN) | this study | <a href="https://benchling.com/s/seq-AkuNI7U3xrabisBNYEZe?m=slm-bs2kPrfQPnzoVEhYY85S">https://benchling.com/s/seq-AkuNI7U3xrabisBNYEZe?m=slm-bs2kPrfQPnzoVEhYY85S</a> |
| pCAGGS-NUCB1-splitTurboID-N (NUCB1-TbN)     | this study | <a href="https://benchling.com/s/seq-TUGS604RkdPznNIVkyLD?m=slm-oWTVR1sH4cY6MywDevL5">https://benchling.com/s/seq-TUGS604RkdPznNIVkyLD?m=slm-oWTVR1sH4cY6MywDevL5</a> |
| pCAGGS-NUCB1-splitTurboID-C (NUCB1-TbC)     | this study | <a href="https://benchling.com/s/seq-9xMVVdXduZi0gWwEYipN?m=slm-AkhAd5JR8xFBsCx1IjV7">https://benchling.com/s/seq-9xMVVdXduZi0gWwEYipN?m=slm-AkhAd5JR8xFBsCx1IjV7</a> |
| p3xFLAG-CMV9-FVIII                          | [1]        |                                                                                                                                                                       |
| p3xFLAG-CMV9-FVIII $\Delta$ PS              | [1]        |                                                                                                                                                                       |

## References

1. Yagi, H., Yagi-Utsumi, M., Honda, R., Ohta, Y., Saito, T., Nishio, M., Ninagawa, S., Suzuki, K., Anzai, T., Kamiya, Y., Aoki, K., Nakanishi, M., Satoh, T., Kato, K.: Improved secretion of glycoproteins using an N-glycan-restricted passport sequence tag recognized by cargo receptor. *Nat. Commun.* 11, 1368 (2020)
2. Yagi, H., Tateo, S., Saito, T., Ohta, Y., Nishi, E., Obitsu, S., Suzuki, T., Seetaha, S., Hellec, C., Nakano, A., Tojima, T., Kato, K.: Deciphering the sub-Golgi localization of glycosyltransferases via 3D super-resolution imaging. *Cell Struct. Funct. advpub*, 24008 (2024)
